# Supplementary material
Source: publisher figshare collection journal article supplement (https://acs.figshare.com/ndownloader/files/10194174)
Supplement: Supplementary file 1 [file 10194174]

## Supporting Information

### **Photovoltaic Performance of Precursor-Vapor-Assisted Solution-Processed Layer polymorph of $\text{Cs}_3\text{Sb}_2\text{I}_9$**

Anupriya Singh,<sup>abc</sup> Karunakara Moorthy Boopathi,<sup>a</sup> Anisha Mohapatra,<sup>a</sup> Yang Fang Chen<sup>bc</sup>, Gang Li<sup>f</sup> and Chih Wei Chu<sup>acde\*</sup>

<sup>a</sup>Research Center for Applied Science, Academia Sinica, Taipei 115, Taiwan (R.O.C.)

<sup>b</sup>Department of Physics, National Taiwan University, Sec. 4, Roosevelt Road, Taipei 106, Taiwan (R.O.C.),

<sup>c</sup>Nano Science and Technology, Taiwan International Graduate Program, Academia Sinica and National Taiwan University, Taiwan (R.O.C.)

<sup>d</sup>College of Engineering, Chang Gung University, Taoyuan City, Taiwan (R.O.C.)

<sup>e</sup>Department of Materials Science and Engineering, National Tsing Hua University, Hsinchu 30013, Taiwan (R.O.C.)

<sup>f</sup>Department of Electronic and Information Engineering, The Hong Kong Polytechnic University, Hung Hom, Kowloon, Hong Kong, China.

\* E-mail: [gchu@gate.sinica.edu.tw](mailto:gchu@gate.sinica.edu.tw)

## Experimental Methods

**Chemicals** – Cesium Iodide (CsI, 99.999 %), Antimony Iodide (SbI<sub>3</sub>, 99.998%), dimethylformamide (DMF), dimethyl sulfoxide (DMSO), were purchased from Alfa Aesar and used without further purification. Poly(3,4-ethylenedioxythiophene):poly(p-styrene sulfonate) (PEDOT:PSS, Clevios P) was bought from Heraeus (Germany). ITO substrates were cleaned with DI water and isopropyl alcohol and then kept in an oven overnight.

**Device fabrication-** UV-Ozone treatment was performed for 15 min. PEDOT:PSS (Clevios P, Heraeus Germany) was spin-coated for 60 s at 4000 rpm over the substrates and then the sample was annealed at 200 °C. A single precursor solution was prepared by mixing 0.25 M of SbI<sub>3</sub> (Alfa Aesar, 99.9 %) and 1 M of CsI (Alfa Aesar, 99.9 %) in DMSO:DMF (0.75:0.25) and then continuous stirring overnight at 70 °C. A drop of this solution was placed on the PEDOT:PSS-coated substrates and spin-coated for 40 s at 6000 rpm. These films (two samples at a time) were annealed at 70 °C for 15 min and then directly moved to glass bottle (diameter: 3 cm; height: 6 cm) at 250 °C. This bottle was covered with a cap after adding 30 µL (30 wt%) of SbI<sub>3</sub> in DMF in the corners of the bottle. The films were maintained at 250 °C for 15 min, then cooled at 200 °C for 5 min to avoid cracks (due to quenching); the temperature was decreased gradually to 150 °C before bringing the sample to room temperature to give the layered Cs<sub>3</sub>Sb<sub>2</sub>I<sub>9</sub>. ITO substrates with PEDOT:PSS annealed at 150 °C were spin coated with the same solution and annealed at 150 °C to get dimer form. A 2% solution of PC<sub>70</sub>BM in chlorobenzene was spin-coated at 3000 rpm and then the sample was annealed at 100 °C for 20 min. Finally, 100 nm of Al was deposited as an electrode. The active area of each device was 10 mm<sup>2</sup>.

**Characterization-** XRD patterns were recorded at room temperature using a Bruker D8 X-ray diffractometer (2θ range: 5–80°; step size: 0.008°) equipped with a diffracted beam monochromator set for Cu Kα radiation (λ = 1.54056 Å). SEM images and EDX spectra were recorded using an FEI Noval 200 scanning electron microscope (15 kV).

Glass substrates spin-coated with PEDOT:PSS were used for XRD measurements; ITO substrates spin-coated with PEDOT:PSS were used for recording SEM images. PL emission spectra of the samples were recorded using an diode laser (475 nm; pulse: 55 ps; 40 MHz; single pulse power: 160 mW; laser spot area: 5  $\mu\text{m}$ ) focused at a beam diameter of approximately 0.5 mm. Absorption spectra of the films were measured using a Jacobs V-670 UV–Vis spectrophotometer. UPS was performed at room temperature using a PHI 5000 Versa Probe apparatus equipped with an Al K $\alpha$  X-ray source (1486.6 eV). UPS was used to measure the valence band using He I emission (21.2 eV, ca. 50 W) as the source of UV light; the take-off angle was 90°. Samples for UPS study were made on only ITO substrates with the same method as was used for active layer preparation of device. EQE spectra were recorded under short-circuit conditions. Devices were encapsulated before they were removed for EQE measurement. The light source was a 75-W Xe lamp (Enlitech, QE-R3011); the light output from the monochromator was focused on the photovoltaic cell being tested (DC mode). The devices were illuminated inside a glove box by the Xe lamp, which functioned as a solar simulator (Thermal Oriel 1000 W) providing a simulated AM 1.5 spectrum (100 mW  $\text{cm}^{-2}$ ). The light intensity was calibrated using a mono-silicon photodiode with a KG-5 color filter (Hamamatsu). For measuring stability, we stored the devices inside a glove box ( $\text{O}_2$ : <20 ppm;  $\text{H}_2\text{O}$ : <0.1 ppm) without encapsulation and then tested their performance.

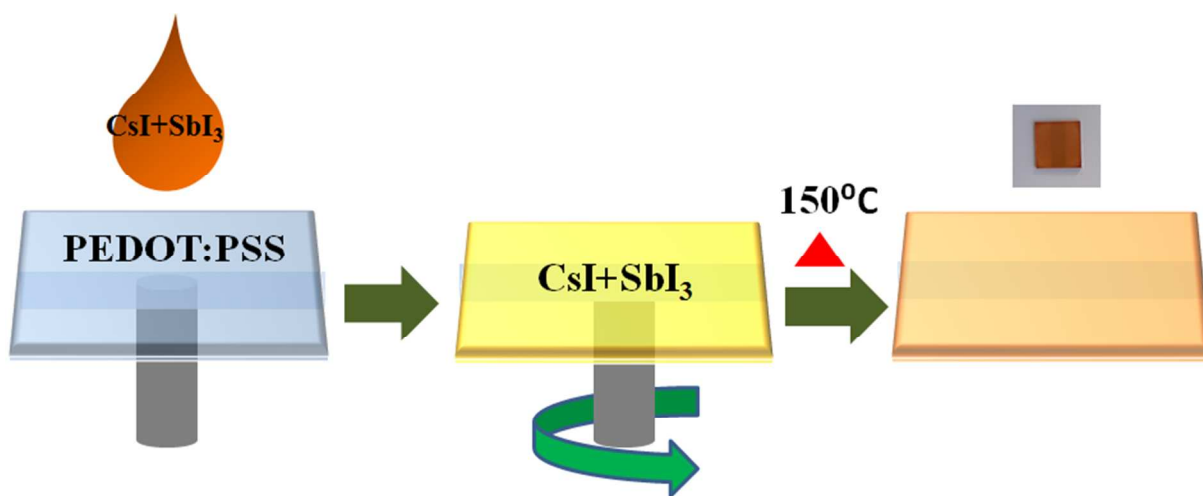

**Figure S1.** Schematic representation of the preparation of dimer-form  $\text{Cs}_3\text{Sb}_2\text{I}_9$  with a real-time photograph of the film.

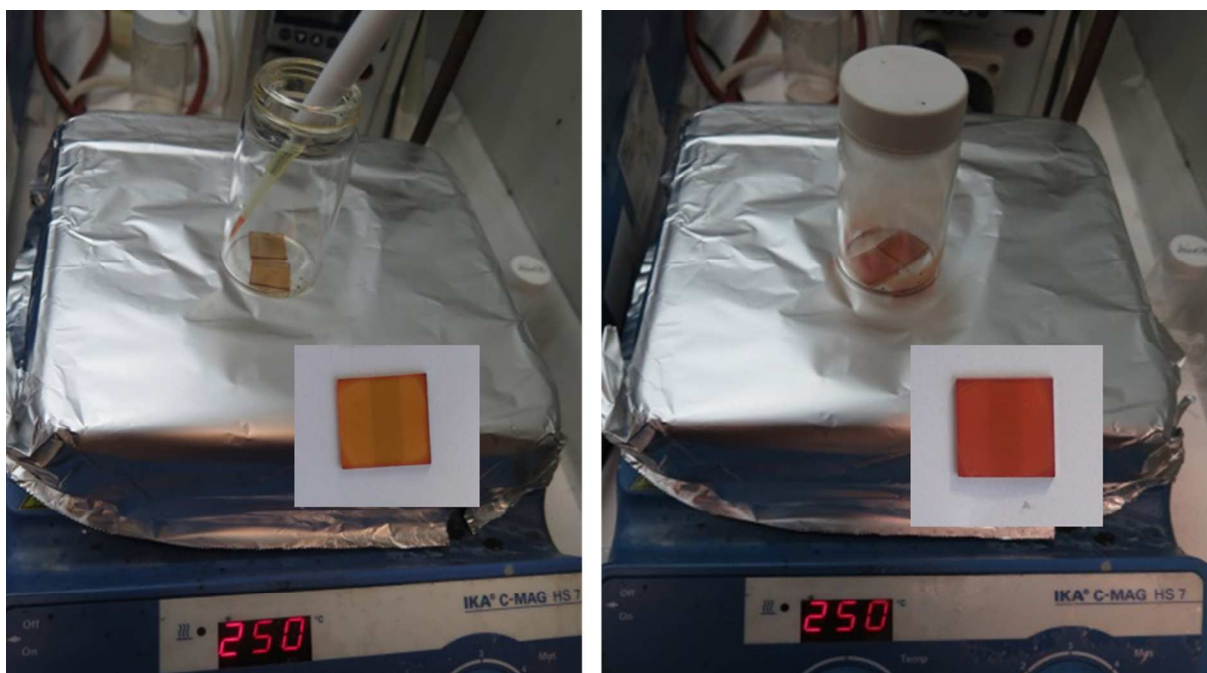

**Figure S2.** Real-time photographs of the dropping of a  $\text{SbI}_3$  solution in DMF at 250 °C to provide extra  $\text{SbI}_3$  to give a final stoichiometric layered-form  $\text{Cs}_3\text{Sb}_2\text{I}_9$  at 250 °C; inset: real-time photographs of the film before and after annealing at 250 °C.

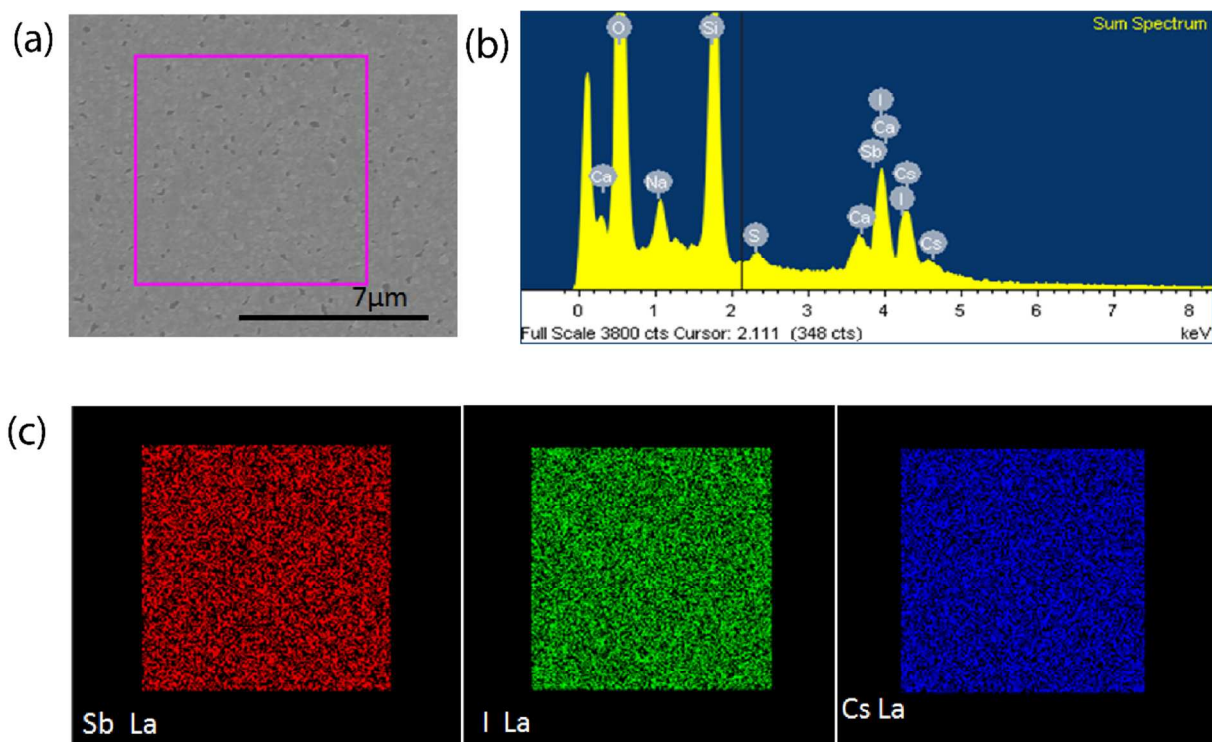

**Figure S3.** (a) Area scanned for EDX. (b) EDX spectra of the layer-form  $\text{Cs}_3\text{Sb}_2\text{I}_9$  films with precursor composition of 0.25 M  $\text{SbI}_3$  and 1 M  $\text{CsI}$  and annealing at 250 °C in the presence of  $\text{SbI}_3$  and DMF vapor. (c) Pictorial visualization of the elements in the area scanned.

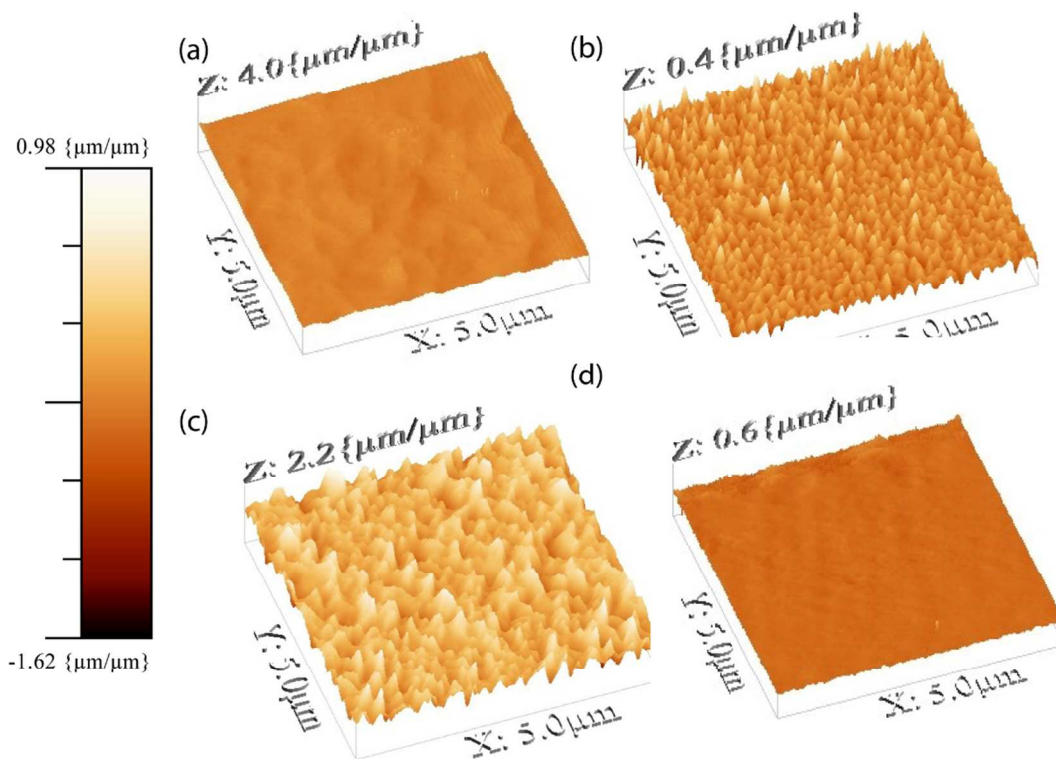

**Figure S4.** 3D AFM images of; (a) as spin-coated film, (b) the film pre-annealed at 70 °C, (c) the layer form, and (d) the dimer form.

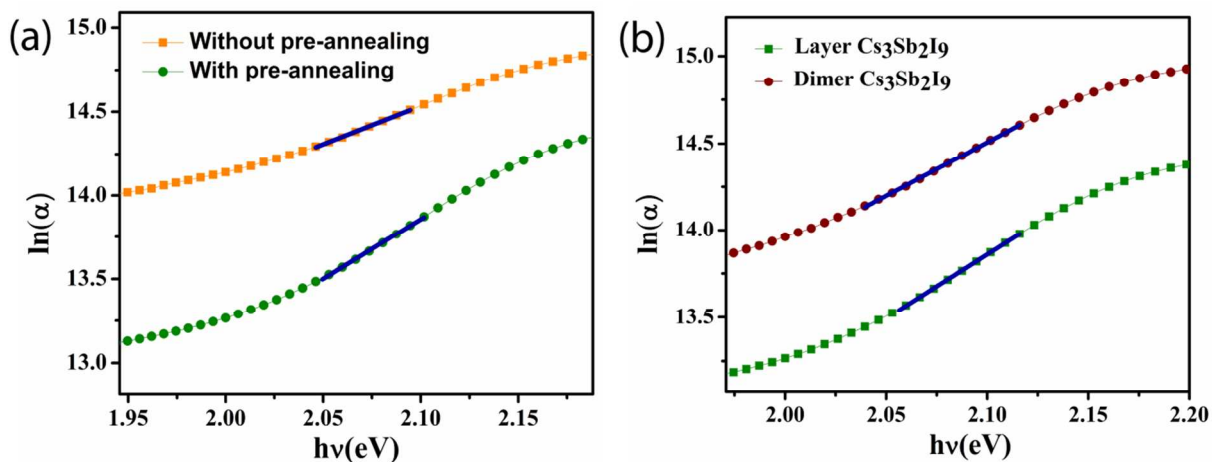

**Figure S5.** (a) Urbach energies for the layered form with and without pre-annealing; with pre-annealing, the Urbach energy decreased, due to the improved morphology. (b) Urbach energy for layered and dimer forms; the Urbach energy of the layered form was less than that of the dimer form.

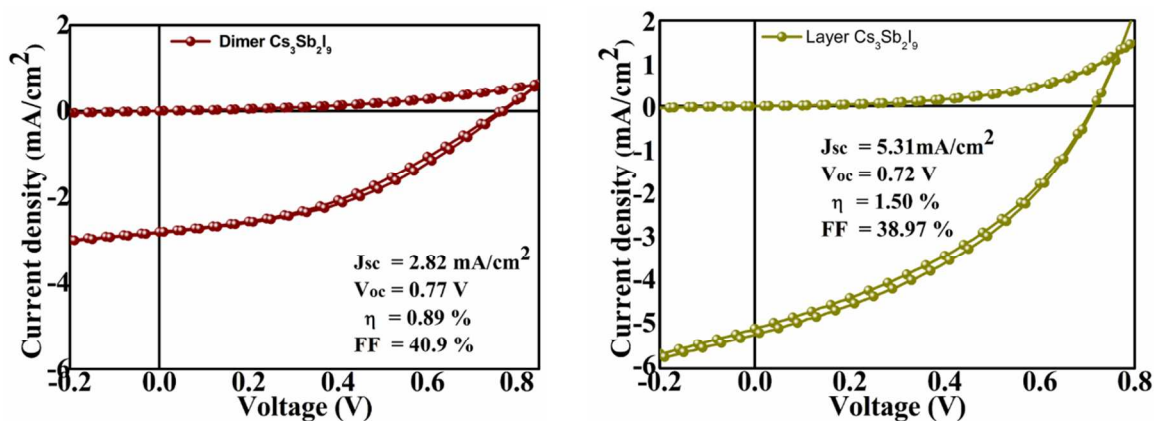

**Figure S6.** Forward and reverse scan for layer and dimer form

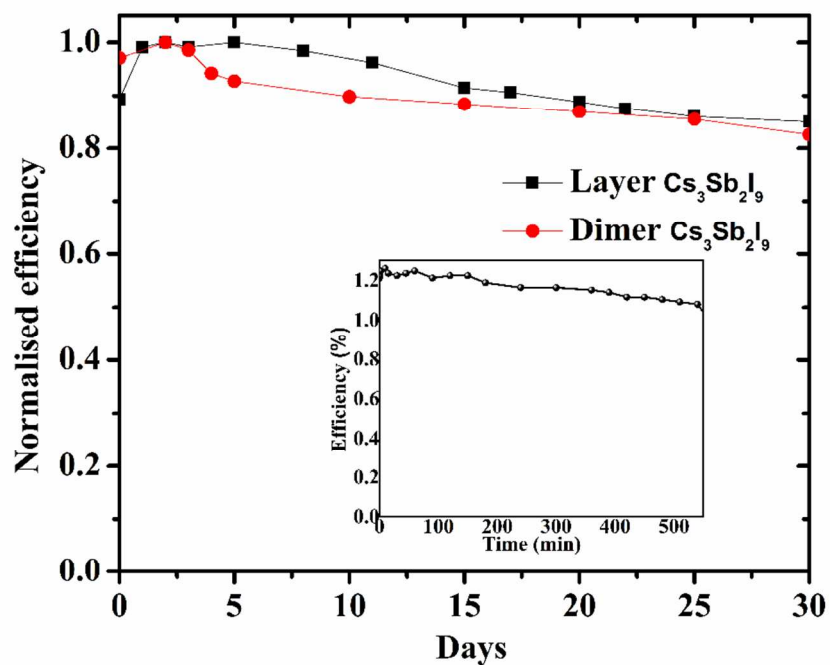

**Figure S7.** Stability of devices incorporating the layer (squares) and dimer (spheres) polymorphs (with only Al as the top electrode), inset showing continuous illumination for device made with layer  $\text{Cs}_3\text{Sb}_2\text{I}_9$ .



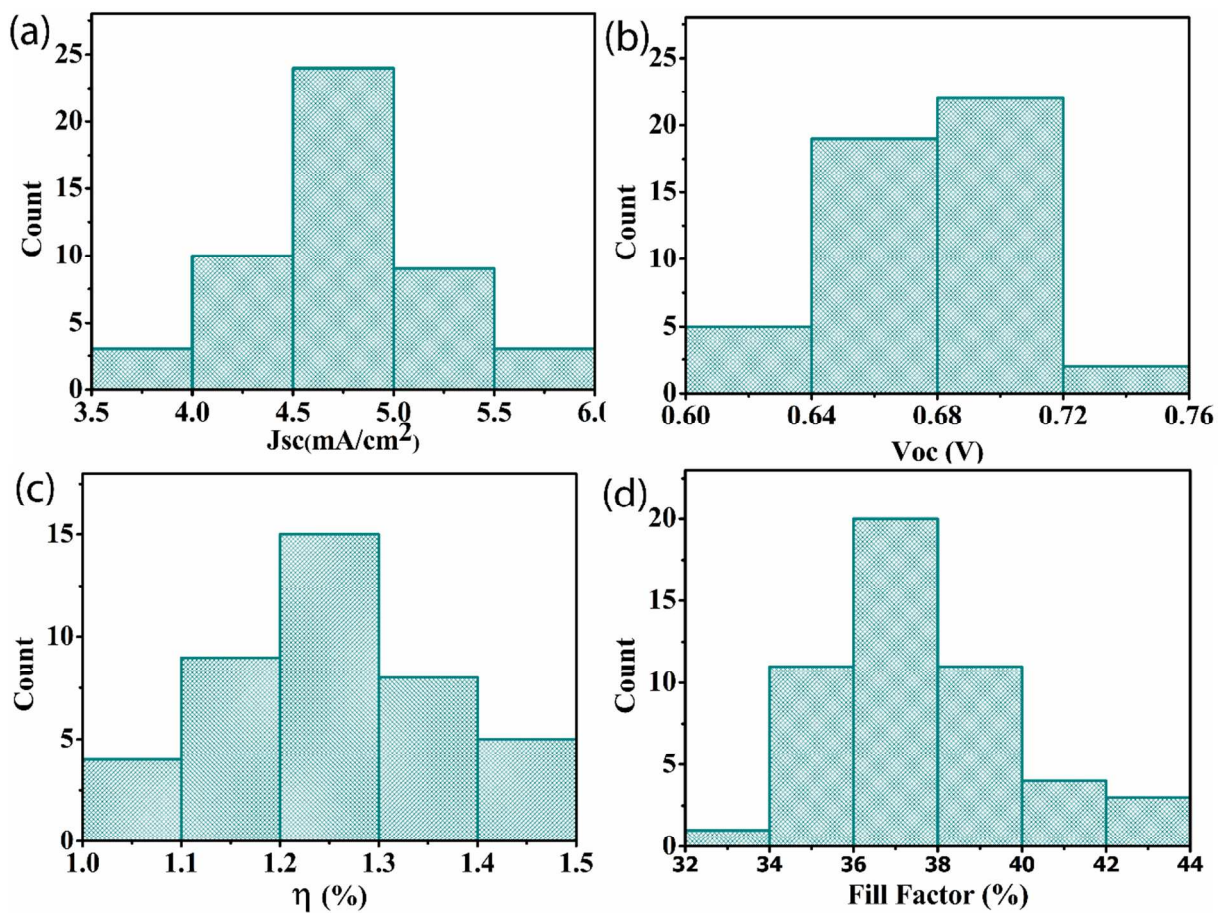

**Figure S8.** Statistical results for (a)  $J_{sc}$ , (b)  $V_{oc}$ , (c) PCE, (d) FF for 50 devices made from the layer  $\text{Cs}_3\text{Sb}_2\text{I}_9$

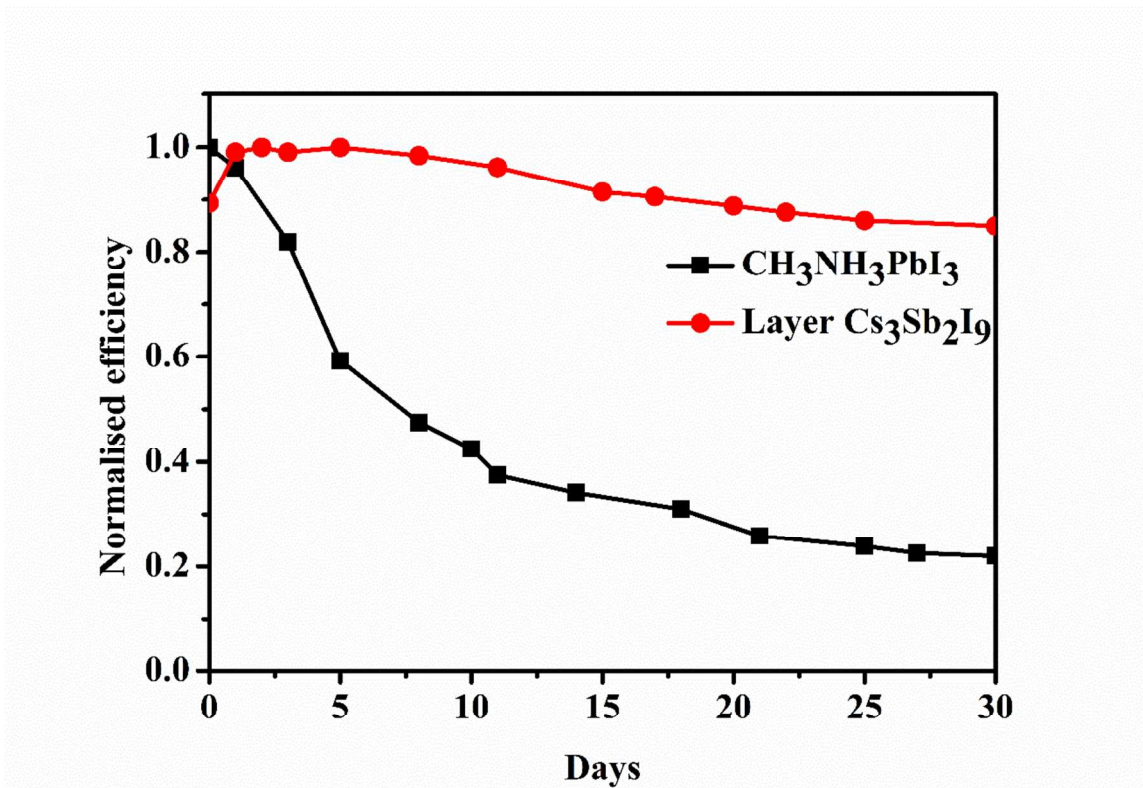

**Figure S9.** Stability of devices made with conventional Pb based perovskite (black squares) and layer Cs<sub>3</sub>Sb<sub>2</sub>I<sub>9</sub> (red spheres).

**Table S1.** Atomic percentages in the layer-form Cs<sub>3</sub>Sb<sub>2</sub>I<sub>9</sub> films prepared using various compositions of the precursor solution for spin-coating, obtained after annealing at 250 °C in the presence of SbI<sub>3</sub> and DMF vapor.

| CsI (M):SbI <sub>3</sub> (M) | Cs/Sb | I/Sb | I/Cs |
|------------------------------|-------|------|------|
| 1:0.1                        | 1.45  | 5.85 | 2.73 |
| 1:0.2                        | 1.46  | 4.92 | 2.86 |
| 1:0.25                       | 1.48  | 4.51 | 3.03 |
| 1:0.3                        | 1.36  | 4.31 | 3.15 |
| Expected                     | 1.50  | 4.50 | 3.0  |

**Table S2.** Device performances of layer-form Cs<sub>3</sub>Sb<sub>2</sub>I<sub>9</sub> obtained at various compositions of the precursor solution, and at different temperatures for the best composition.

| CsI (M):SbI <sub>3</sub> (M)    | J <sub>sc</sub> (mA cm <sup>-2</sup> ) | V <sub>oc</sub> (V) | η (%) | FF (%) |
|---------------------------------|----------------------------------------|---------------------|-------|--------|
| 1:0.1                           | —                                      | —                   | —     | —      |
| 1:0.2                           | 5.03                                   | 0.62                | 1.15  | 37.32  |
| 1:0.25                          | 5.16                                   | 0.71                | 1.42  | 38.70  |
| 1:0.30                          | 4.50                                   | 0.67                | 1.11  | 36.85  |
| 1:0.35                          | 4.24                                   | 0.60                | 0.95  | 36.20  |
| <b>Temperature<br/>(1:0.25)</b> |                                        |                     |       |        |
| 250 °C                          | 5.16                                   | 0.71                | 1.42  | 38.70  |
| 275 °C                          | 4.00                                   | 0.65                | 0.96  | 37.10  |
| 300 °C                          | 3.63                                   | 0.67                | 0.91  | 36.82  |

**Table S3.** Effect of film thickness on device performance.

| Speed | V <sub>oc</sub> (V) | J <sub>sc</sub> (mA cm <sup>-2</sup> ) | η (%) | FF (%) |
|-------|---------------------|----------------------------------------|-------|--------|
| 4000  | 0.65                | 4.22                                   | 1.01  | 36.82  |
| 6000  | 0.69                | 4.32                                   | 1.11  | 37.41  |
| 8000  | 0.56                | 4.43                                   | 0.90  | 36.36  |

**Table S4.** Comparison between Pb and Sb in terms of toxicity and efficiency.

| Metal         | Toxicity                                             | Efficiency                                              |
|---------------|------------------------------------------------------|---------------------------------------------------------|
| Lead (Pb)     | Highly toxic (Absorbed by human body)                | 3.8 % (2009) <sup>1</sup><br>22.1 % (2017) <sup>2</sup> |
| Antimony (Sb) | Moderately Toxic (Excreted through urine and faeces) | <0.1 % <sup>3</sup><br>1.5% (Present work)              |

## References:

(1) Kojima, A.; Teshima, K.; Shirai, Y.; Miyasaka, T. Organometal Halide Perovskites as Visible-Light Sensitizers for Photovoltaic Cells. *J. Am. Chem. Soc.* **2009**, *131*, 6050–6051.

- (2) Yang, W.S.; Park, B.W.; Jung, E. H.; Jeon, N. J.; Kim, Y. C.; Lee, D. U; Shin, S. S.; Seo, J.; Kim, E. K.; Noh, J. H.; Seok, S.II Iodide management in formamidinium-lead-halide-based perovskite layers for efficient solar cells. *Science* **2017**, *356*, 1376-1379.
- (3) Saparov, B.; Hong, F.; Sun, J.-P.; Duan, H.-S.; Meng, W; Cameron, S.; Hill, I. G.; Yan Y.; Mitzi, D. B. Thin-Film Preparation and Characterization of  $\text{Cs}_3\text{Sb}_2\text{I}_9$ : A Lead-Free Layered Perovskite Semiconductor. *Chem. Mater.* **2015**, *27*, 5622-5632.
